# Supplementary material for: Identification of Blood Transport Proteins to Carry Temoporfin: A Domino Approach from Virtual Screening to Synthesis and In Vitro PDT Testing
Source: MDPI journal article supplement (doi:10.3390/pharmaceutics15030919), 2023-03-11
Supplement: s1 [file s1]

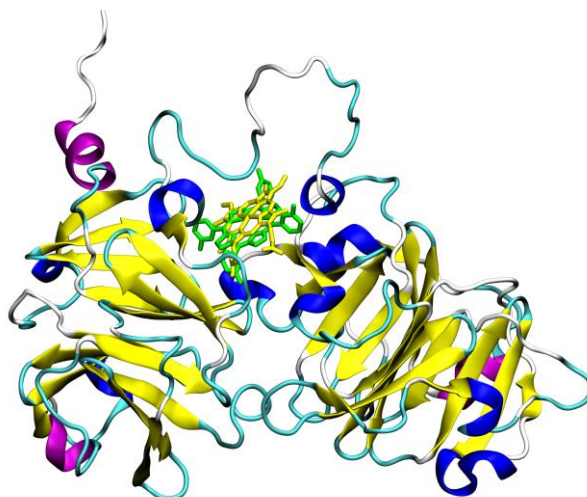

**Figure S1.** Superposition of the crystallographic structure of heme (in yellow, PDB 1qjs) and docked structure of mTHPC (in green) in the heme binding sites of Hx. Image created with VMD.

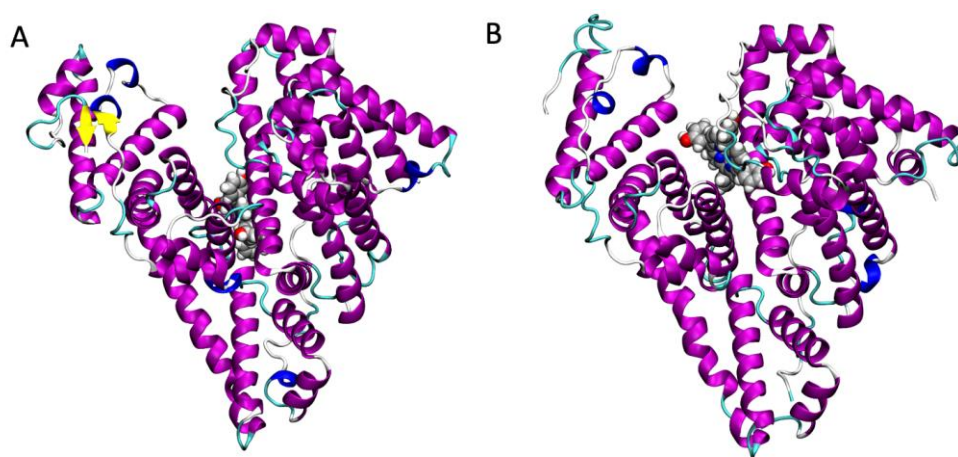

**Figure S2.** mTHPC binding pocket in (A) afamin and in (B) HSA, identified by the docking protocol. Images created with VMD.

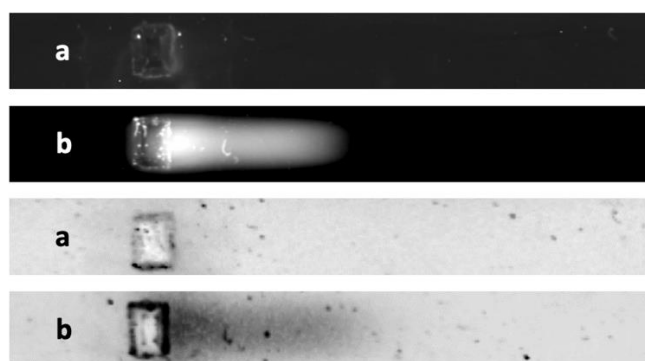

**Figure S3.** The agarose gel electrophoresis of (a) mTHPC, and (b) mTHPC@apoMb. The gel images were acquired before staining, in fluorescent mode (top), and after staining with Coomassie blue, in colorimetric mode (bottom).
